# Supplementary material for: Daily global fire radiative power fields estimation from one or two MODIS instruments
Source: Copernicus journal article supplement (doi:10.5194/acp-14-13377-2014), 2014-12-16
Supplement: Supplementary file 1 [file acp-14-13377-2014-supplement.zip]

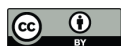

## *Supplement of*

# **Daily global fire radiative power fields estimation from one or two MODIS instruments**

**S. Remy and J. W. Kaiser**

*Correspondence to:* S. Remy (samuel.remy@ecmwf.int)

- [acp-14-13377-2014-supplement-cover-letter.pdf](#)
- [figsel](#)
  - [diffdistaqua.png](#)
  - [diffdistterra.png](#)
  - [frpaquabase.png](#)
  - [frpaquabase2.png](#)
  - [frpaqualin.png](#)
  - [frpaquanonlin.png](#)
  - [frpref.png](#)
  - [frpref2.png](#)
  - [frpterrabase.png](#)
  - [frpterrabase2.png](#)
  - [frpterralin.png](#)
  - [frpterranonlin.png](#)
  - [listaqua.png](#)
  - [listglob.png](#)
  - [listregion\\_af.png](#)
  - [listregion\\_amnord.png](#)
  - [listregion\\_amsud.png](#)
  - [listregion\\_indo.png](#)
  - [listterra.png](#)
  - [listterra\\_2000.png](#)
  - [mcd12legend.png](#)
  - [regaqua.png](#)

- regaqua\_ad.png
- regression25\_-17\_terra.png
- regression37-59aqua.png
- regterra.png
- regterra\_ad.png
- widthaqua.png
- widthaqua\_ad.png
